# Supplementary material for: Leptin Receptor Gene Variant rs11804091 Is Associated with BMI and Insulin Resistance in Spanish Female Obese Children: A Case-Control Study
Source: MDPI journal article supplement (doi:10.3390/ijms18081690), 2017-08-03
Supplement: s1 [file s1]

## Supplementary Material

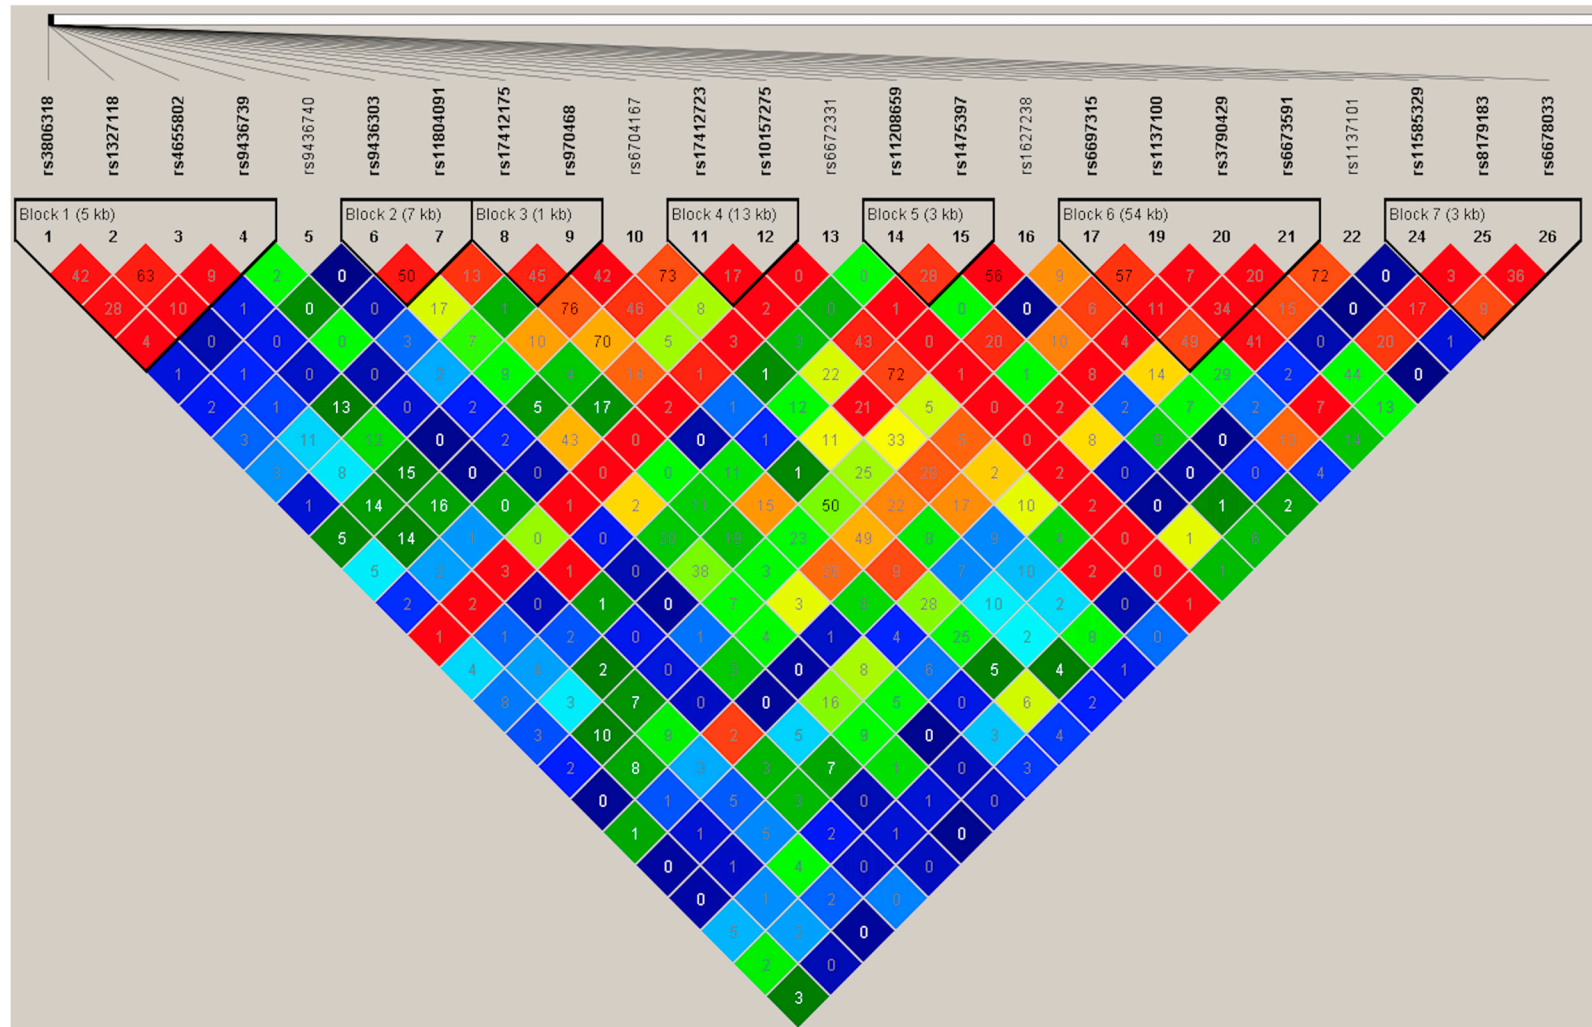

**Figure S1.** Linkage disequilibrium structure in terms of  $r^2$  of the 26 genotyped *LEPR* polymorphisms in the whole studied population

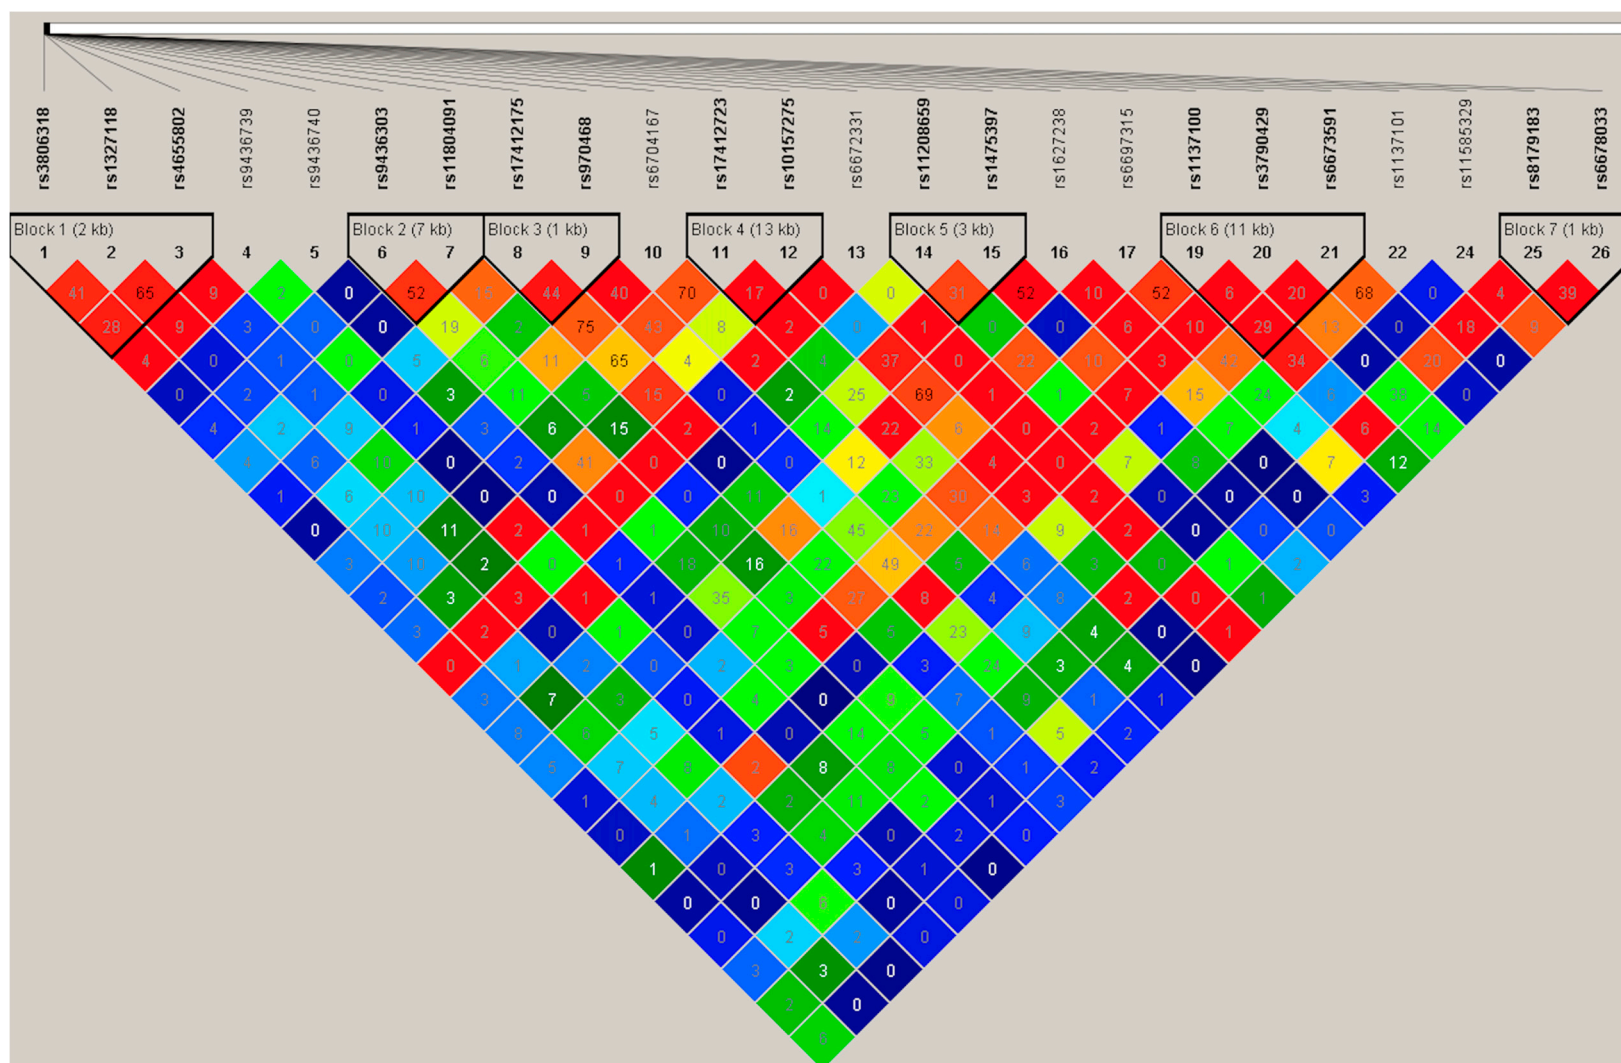

**Figure S2.** Linkage disequilibrium structure in terms of  $r^2$  of the 26 genotyped *LEPR* polymorphisms in Spanish girls

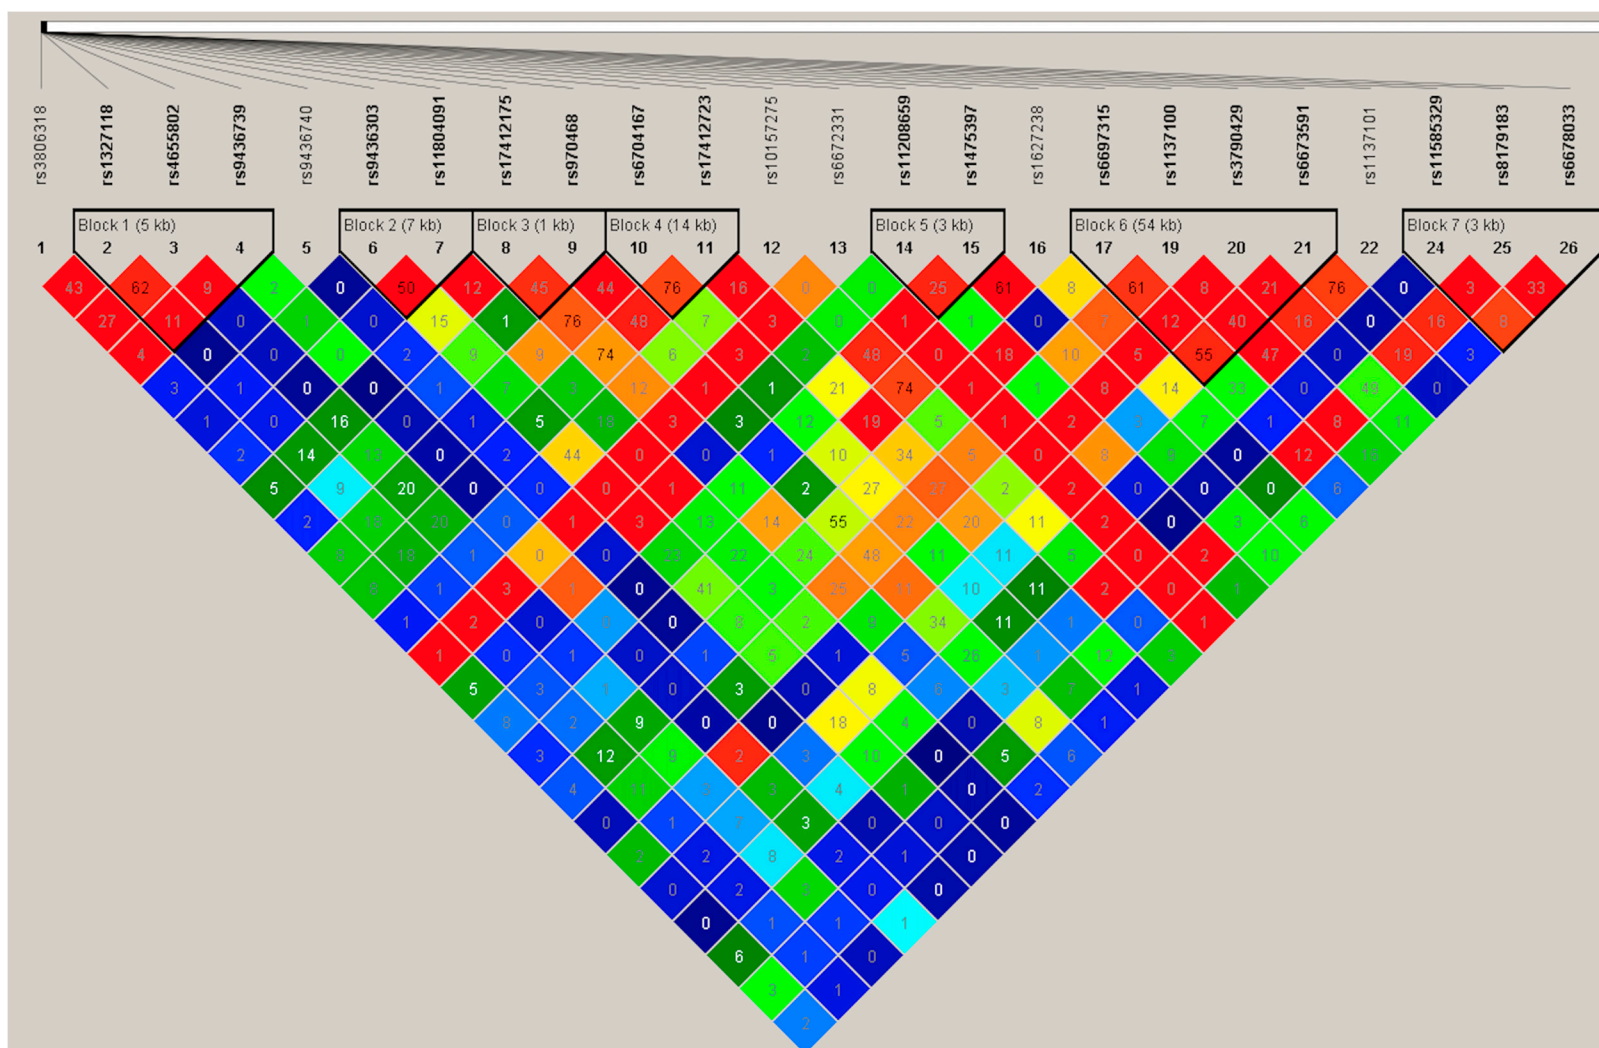

**Figure S3.** Linkage disequilibrium structure in terms of  $r^2$  of the 26 genotyped *LEPR* polymorphisms in Spanish boys.
